# Supplementary material for: High-strength fibrous sensors with an enhanced aggregate state for biomechanical monitoring of the Achilles tendon
Source: Royal Society of Chemistry journal article supplement (doi:10.1039/d4tb01255k), 2024-01-01
Supplement: d4tb01255k1.pdf [file d4tb01255k1.pdf]

Supplementary data for

## High-strength fibrous sensors with enhanced aggregate state for biomechanical monitoring of Achilles tendon

Ying Guo,<sup>a</sup> Ting Yan,<sup>a</sup> Han Gao,<sup>b</sup> Luyi Sun,<sup>b</sup> Shuanglei Wei,<sup>a</sup> Jun Chen,<sup>b</sup> Yanhong Wei,<sup>c</sup> Guoyin Chen,<sup>a</sup> Kai Hou,<sup>a,c,\*</sup> Meifang Zhu<sup>a</sup>

<sup>a</sup>State Key Laboratory for Modification of Chemical Fibers and Polymer Materials, College of Materials Science and Engineering, Donghua University, 2999 North Renmin Road, Shanghai 201620, China.

<sup>b</sup>Sports Medicine Institute of Fudan University, Department of Sports Medicine, Huashan Hospital, Fudan University, 12 Middle Wulumuqi Road, Shanghai 200040, China.

<sup>c</sup>Jiangsu Gem Advanced Fiber Materials Research Institute Co., Ltd, 12A, Zilang Sci&TechPark, 60 Chongzhou Avenue, Chongchuan District, Nantong 226000, China.

\* Corresponding authors: houkai711@dhu.edu.cn

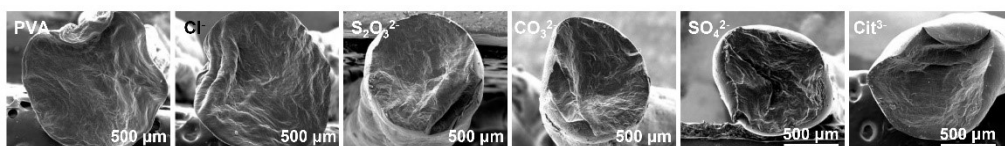

Fig. S1. SEM images of hydrogel fibers soaked with 1.0 M sodium salts.

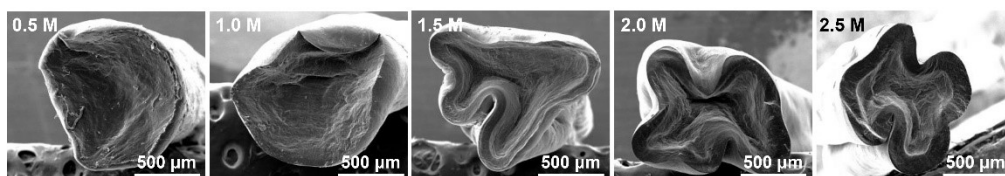

Fig. S2. SEM images of hydrogel fibers soaked in Na<sub>3</sub>Cit with different concentration.

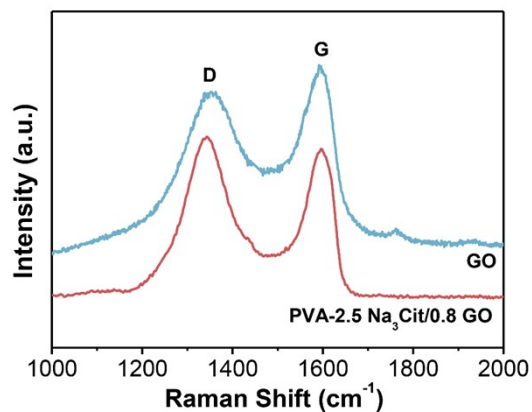

Fig.S3. Raman spectra of GO powders and PVA-2.5 Na<sub>3</sub>Cit/0.8 GO fiber.

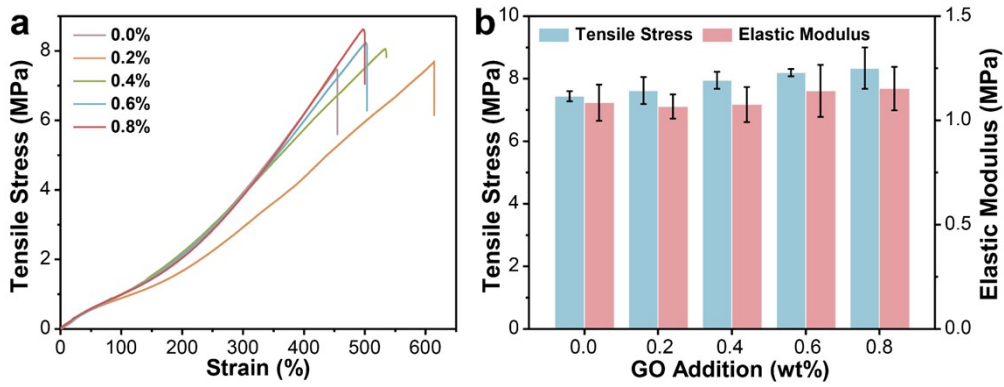

**Fig. S4.** Stress-strain curves (a), corresponding tensile strength and elastic modulus (b) of composite hydrogel fibers with different GO addition. Data are presented as means  $\pm$  standard deviation (SD, n=3).

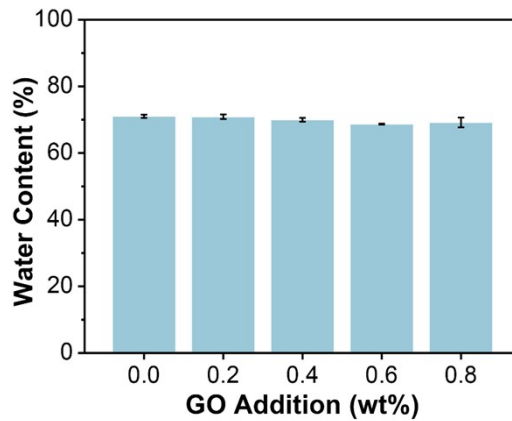

**Fig. S5.** Water content of composite hydrogel fibers with different GO addition. Data are presented as means  $\pm$  standard deviation (SD, n=3).

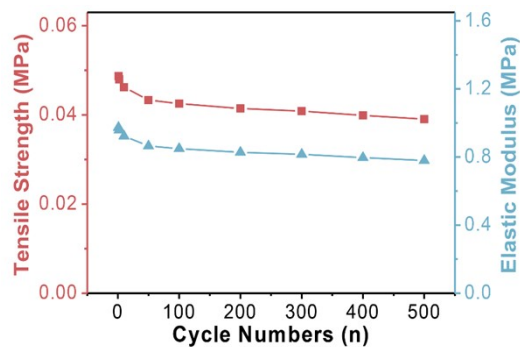

**Fig. S6.** Maximum stress and elastic modulus versus tensile cycle.

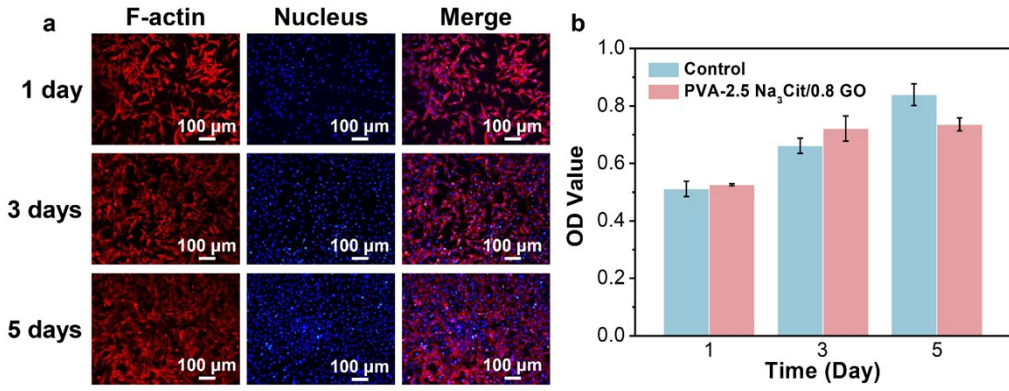

**Fig. S7.** (a) Cytoskeleton staining of MSCs after 1, 3 and 5 days. (b) CCK-8 results of each group for assessing the cell proliferation. Data are presented as means  $\pm$  standard deviation (SD, n=3).

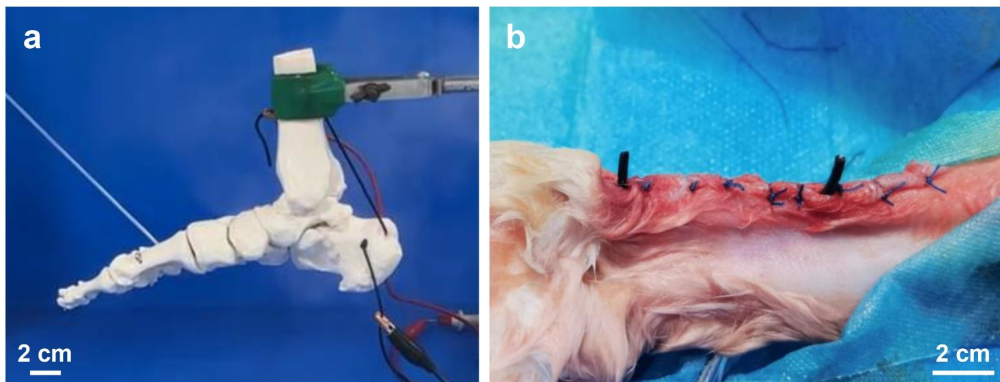

**Fig. S8.** Photographs of *in vitro* and *in vivo* models for fibrous sensor.

**Table S1.** The nomenclature and components of salting-out hydrogel fibers.

| <b>Samples</b>                                        | <b>Salt</b>                                   | <b>Salt Concentration (M)</b> | <b>DI Water (g)</b> | <b>PVA (g)</b> | <b>PVA (wt%)</b> |
|-------------------------------------------------------|-----------------------------------------------|-------------------------------|---------------------|----------------|------------------|
| PVA                                                   | /                                             | 0.0                           | 90                  | 16             | 15.10            |
| PVA-1.0 NaCl                                          | NaCl                                          | 1.0                           | 90                  | 16             | 15.10            |
| PVA-1.0 Na <sub>2</sub> S <sub>2</sub> O <sub>3</sub> | Na <sub>2</sub> S <sub>2</sub> O <sub>3</sub> | 1.0                           | 90                  | 16             | 15.10            |
| PVA-1.0 Na <sub>2</sub> CO <sub>3</sub>               | Na <sub>2</sub> CO <sub>3</sub>               | 1.0                           | 90                  | 16             | 15.10            |
| PVA-1.0 Na <sub>2</sub> SO <sub>4</sub>               | Na <sub>2</sub> SO <sub>4</sub>               | 1.0                           | 90                  | 16             | 15.10            |
| PVA-1.0 Na <sub>3</sub> Cit                           | Na <sub>3</sub> Cit                           | 1.0                           | 90                  | 16             | 15.10            |
| PVA-0.5 Na <sub>3</sub> Cit                           | Na <sub>3</sub> Cit                           | 0.5                           | 90                  | 16             | 15.10            |
| PVA-1.5 Na <sub>3</sub> Cit                           | Na <sub>3</sub> Cit                           | 1.5                           | 90                  | 16             | 15.10            |
| PVA-2.0 Na <sub>3</sub> Cit                           | Na <sub>3</sub> Cit                           | 2.0                           | 90                  | 16             | 15.10            |
| PVA-2.5 Na <sub>3</sub> Cit                           | Na <sub>3</sub> Cit                           | 2.5                           | 90                  | 16             | 15.10            |

**Table S2.** The nomenclature and components of rGO composite hydrogel fibers.

| <b>Samples</b>                     | <b>GO (wt%)</b> | <b>DI Water (g)</b> | <b>PVA (g)</b> | <b>PVA (wt%)</b> |
|------------------------------------|-----------------|---------------------|----------------|------------------|
| PVA-2.5 Na <sub>3</sub> Cit        | 0.0             | 90                  | 16             | 15.10            |
| PVA-2.5 Na <sub>3</sub> Cit/0.2 GO | 0.2             | 90                  | 16             | 15.10            |
| PVA-2.5 Na <sub>3</sub> Cit/0.4 GO | 0.4             | 90                  | 16             | 15.10            |
| PVA-2.5 Na <sub>3</sub> Cit/0.6 GO | 0.6             | 90                  | 16             | 15.10            |
| PVA-2.5 Na <sub>3</sub> Cit/0.8 GO | 0.8             | 90                  | 16             | 15.10            |

**Table S3.** Comparisons of PVA-2.5 Na<sub>3</sub>Cit and other hydrogel-based strain sensors in the literature in terms of tensile strength and water content.

| Name                                                | Tensile Strength | Water Content | Ref.             |
|-----------------------------------------------------|------------------|---------------|------------------|
| Fe <sub>3</sub> O <sub>4</sub> @MXene/PVA-A         | 150.10 kPa       | 91.3%         | [36]             |
| PVA <sub>0.2</sub> HA-Ca <sub>0.4</sub>             | 0.47 MPa         | 79.7%         | [37]             |
| PVA-PAANa-PAH                                       | 0.86 MPa         | 77.5%         | [38]             |
| PPM-NL                                              | 0.93 MPa         | 65.1%         | [39]             |
| PVA-TA-EGaIn                                        | 1.13 MPa         | 75.0%         | [40]             |
| PVA/PA/APSi-4                                       | 1.27 MPa         | 82.9%         | [41]             |
| PC <sub>4.5</sub> T <sub>6</sub> M <sub>45</sub> -3 | 1.80 MPa         | 81.0%         | [23]             |
| P(AA-co-LMA) <sub>CTAB</sub> -41.3%                 | 2.08 MPa         | 41.3%         | [42]             |
| GO/PAA/KCl <sub>12-20</sub>                         | 2.65 MPa         | 72.0%         | [43]             |
| F-PVA-TA <sub>0.1</sub> -Ag <sub>0.1</sub>          | 3.00 MPa         | 75.6%         | [44]             |
| FCAS                                                | 4.50 MPa         | 79.5%         | [45]             |
| PMAl-Ni-3                                           | 6.77 MPa         | 49.3%         | [46]             |
| M-PVA-1.6                                           | 7.20 MPa         | 36.9%         | [47]             |
| PVA/HPS-PA                                          | 9.33 MPa         | 27.0%         | [48]             |
| <b>PVA-2.5 Na<sub>3</sub>Cit</b>                    | <b>7.40 MPa</b>  | <b>71.9%</b>  | <b>This Work</b> |

**Table S4.** Comparisons of PVA-2.5 Na<sub>3</sub>Cit and other hydrogel-based strain sensors in the literature in terms of elastic modulus and water content.

| Name                                                | Elastic Modulus | Water Content | Ref.             |
|-----------------------------------------------------|-----------------|---------------|------------------|
| PC <sub>4.5</sub> T <sub>6</sub> M <sub>45</sub> -3 | 2.40 kPa        | 81.0%         | [23]             |
| PHALSD <sub>5</sub>                                 | 8.73 kPa        | 65.1%         | [49]             |
| PA/TA/PAA                                           | 15.00 kPa       | 92.4%         | [50]             |
| PVA-PAANa-PAH                                       | 24.00 kPa       | 77.5%         | [38]             |
| PAM/CMC/NaCl                                        | 40.00 kPa       | 66.1%         | [51]             |
| PVA <sub>0.2</sub> HA-Ca <sub>0.4</sub>             | 42.00 kPa       | 79.7%         | [37]             |
| Fe <sub>3</sub> O <sub>4</sub> @MXene/PVA-A         | 44.88 kPa       | 91.3%         | [36]             |
| P(AM-AN-MA)/Fe <sup>3+</sup>                        | 0.06 MPa        | 83.9%         | [52]             |
| SMRH                                                | 112.45 kPa      | 63.4%         | [53]             |
| PAC@200%                                            | 0.27 MPa        | 85.7%         | [54]             |
| P(AA-co-LMA) <sub>CTAB</sub> -41.3%                 | 353.40 kPa      | 41.3%         | [42]             |
| PAM-ALG-PPy                                         | 736.10 kPa      | 88.3%         | [13]             |
| M <sub>d</sub> -x-Fe                                | 1.10 MPa        | 45.0%         | [55]             |
| PVA7                                                | 1.90 MPa        | 57.0%         | [56]             |
| <b>PVA-2.5 Na<sub>3</sub>Cit</b>                    | <b>1.09 MPa</b> | <b>71.9%</b>  | <b>This Work</b> |
